# Supplementary material
Source: Research Square preprint supplement (doi:10.21203/rs.3.rs-8933471/v1)
Supplement: Supplementary file 1 [file 4f0fc0433082cf5408efb7c9.docx]

| **Variable** | **N** | **Timely, n= 85** | **Unweighted Proportion Timely (95% CI*2*)** | **Weighted Proportion Timely (95% CI*2*)** | **Crude OR (95% CI)** | **p-value** | **Adjusted OR (95% CI)** | **p-value** |
| --- | --- | --- | --- | --- | --- | --- | --- | --- |
| **Sex of caregiver** | 410 |  |  |  |  |  |  |  |
| Female |  | 76 | 21% (17%–25%) | 24% (17% – 31%) | 1 |  | 1 |  |
| Male |  | 9 | 18% (7%–29%) | 21% (10% – 32%) | 0.83 (0.44-1.57) | 0.54 |  |  |
| **Marital status of caregiver** | 409 |  |  |  |  |  |  |  |
| Married |  | 83 | 21% (17%–25%) | 25% (17% – 32%) | 1 |  | 1 |  |
| Not Married/Divorced/Widowed |  | 2 | 13% (0%–29%) | 3% (0% – 8%) | 0.10 (0.02-0.54) | 0.00 | **0.21 (0.05-0.87)** | **0.03** |
| **Education of caregiver** | 410 |  |  |  |  |  |  |  |
| No education |  | 25 | 26% (17%–35%) | 30% (14% – 45%) | 1 |  |  |  |
| Primary education |  | 34 | 16% (11%–21%) | 19% (11% – 27%) | 0.56 (0.23-1.37) | 0.19 |  |  |
| Secondary/Higher education |  | 26 | 25% (17%–33%) | 27% (17% – 36%) | 0.86 (0.40-1.83) | 0.67 |  |  |
| **Age** | 410 |  | 29 (26, 40) | 28 (26, 35) | 0.99 (0.97-1.02) | 0.63 |  |  |
| **Number of people in the household** | 406 |  | 6.00 (5.00, 9.00) | 7.00 (5.00, 9.00) | 1.07 (0.98-1.20) | 0.13 |  |  |
| **Assets based socio-economic quantiles** | 410 |  |  |  |  |  |  |  |
| poor quintile |  | 30 | 23% (16%–31%) | 23% (16% – 31%) | 1 |  |  |  |
| middle |  | 19 | 14% (8.3%–20%) | 19% (12% – 26%) | 0.78 (0.40-1.52) | 0.44 |  |  |
| richest quintile |  | 36 | 24% (17%–31%) | 28% (16% – 41%) | 1.31 (0.67-2.56 ) | 0.41 |  |  |
| **Main income of the household** | 410 |  |  |  |  |  |  |  |
| Fishing/Agriculture/Cash Crop Sales |  | 75 | 21% (17%–25%) | 24% (18% – 30%) | 1 |  | 1 |  |
| Commerce/Shop |  | 5 | 25% (6.0%–44%) | 24% (5% – 43%) | 0.97 (0.40-2.38) | 0.94 | 0.69 (0.29-1.64) | 0.37 |
| Medical/Teacher/Government |  | 4 | 29% (5%–52%) | 40% (10% – 70%) | 2.05 (0.63-6.68) | 0.21 | 1.11 (0.44-2.81) | 0.80 |
| Other |  | 1 | 5% (0%–13%) | 5% (-2% – 12%) | 0.17 (0.04-0.76) | 0.02 | 0.20 (0.02-2.48) | 0.18 |
| **Nearest health facility** | 407 |  |  |  |  |  |  |  |
| Informal facility |  | 5 | 6% (1%–11%) | 5% (0% – 10%) | 1 |  | 1 |  |
| Formal Facility (including CHW) |  | 80 | 25% (20%–29%) | 30% (21% – 38%) | 7.78 (2.50-24.2) | 0.00 | **6.94 (2.18-22.1)** | **0.00** |
| **Mode of transport to health facility** | 408 |  |  |  |  |  |  |  |
| On foot |  | 67 | 20% (16%–24%) | 24% (16% – 32%) | 1 |  | 1 |  |
| Bicycle |  | 1 | 10% (0%–29%) | 9% (0% – 24%) | 0.30 (0.04-2.34) | 0.23 |  |  |
| Public transport /Motorcycle |  | 17 | 26% (15%–37%) | 27% (16% – 38%) | 1.17 (0.56-2.45) | 0.66 |  |  |
| **Distance to the nearest formal health center** | 410 |  | 2.32 (0.54, 3.98) | 1.84 (0.49, 3.51) | 1.00(0.90-1.08) | 0.77 |  |  |
| **Heard malaria message** | 410 |  |  |  |  |  |  |  |
| No |  | 10 | 9% (4%–15%) | 11% (7% – 16%) | 1 |  | 1 |  |
| Yes |  | 75 | 25% (20%–30%) | 28% (19% – 37%) | 3.05 (1.44-6.48) | 0.00 | **2.69 (1.12-6.46)** | **0.03** |
| **Perception of malaria severity** | 408 |  |  |  |  |  |  |  |
| Not/Somewhat a serious health problem |  | 8 | 26% (10%–41%) | 31% (17% – 46%) | 1 |  |  |  |
| Very serious |  | 77 | 20% (16%–24%) | 23% (16% – 30%) | 0.66 (0.30-1.48) | 0.29 |  |  |
| **Mentioned fever as malaria symptom** | 410 |  |  |  |  |  |  |  |
| No |  | 7 | 10% (3.1%–18%) | 11% (3% – 18%) | 1 |  | 1 |  |
| Yes |  | 78 | 23% (18%–27%) | 26% (18% – 34%) | 2.97 (1.26-7.01) | 0.02 | **2.96 (1.26-6.99)** | **0.02** |
| **Is malaria treatable** | 404 |  |  |  |  |  |  |  |
| No |  | 5 | 9% (1%–16%) | 10% (3% – 17%) | 1 |  | 1 |  |
| Yes |  | 78 | 23% (18%–27%) | 26% (18% – 34%) | 3.22 (1.22-8.46) | 0.02 | 1.86 (0.65-5.24) | 0.22 |
| **Biological child** | 405 |  |  |  |  |  |  |  |
| No |  | 9 | 35% (16%–53%) | 30% (6% – 54%) | 1 |  |  |  |
| Yes |  | 75 | 20% (16%–24%) | 23% (16% – 30%) | 0.71 (0.21-2.39) | 0.563 |  |  |

Note: 1: Reference category CI: Confidence Interval OR: Odds Ratio

Table 1: Factors associated with prompt formal health-seeking among children under five with signs of malaria or danger signs
